# Supplementary material for: Two-dimensional graphitic carbon nitride/N-doped carbon with a direct Z-scheme heterojunction for photocatalytic generation of hydrogen
Source: Royal Society of Chemistry journal article supplement (doi:10.1039/d1na00629k), 2021-01-01
Supplement: d1na00629k1.pdf [file d1na00629k1.pdf]

## Supporting Information

# Two-dimensional Graphitic Carbon Nitride/N-doped Carbon with Direct Z-scheme Heterojunction for Photocatalytic Generation of Hydrogen

Jing Wang,<sup>a‡</sup> Youcai Sun,<sup>a‡</sup> Jianwei Lai,<sup>b</sup> Runhui Pan,<sup>a</sup> Yulei Fan,<sup>a</sup> Xiongwei Wu,<sup>c</sup> Man Ou,<sup>a</sup> Yusong Zhu,<sup>a</sup> Lijun Fu,<sup>a</sup> Feifei Shi,<sup>\*b</sup> and Yuping Wu<sup>\*a</sup>

<sup>a</sup> College of Chemical Engineering and School of Energy Science and Engineering, Nanjing Tech University, Nanjing, Jiangsu, 211816, China. Email: wuyp@njtech.edu.cn

<sup>b</sup> John and Willie Leone Family Department of Energy and Mineral Engineering, Pennsylvania State University, University Park, PA, 16802, USA. Email: feifeishi@psu.edu (Shi)

<sup>c</sup> School of Chemistry and Materials Science, Hunan Agricultural University, Changsha, 410128, China.

<sup>‡</sup>These authors contributed equally.

## Experimental sections

### Preparation of N-doped carbon (NC)

NC was prepared by a simple hydrothermal method. Typically, 0.48 g of citric acid and 0.45 g of urea were dissolved in 10 ml deionized water. The above aqueous solution was transferred into a Teflon-sealed autoclave and heated for 8 h at 180 °C. After cooling it to room temperature, the product was collected by centrifuging.

### Synthesis of bulk g-C<sub>3</sub>N<sub>4</sub> (bulk C<sub>3</sub>N<sub>4</sub>)

Firstly, 5.0 g melamine was put into an alumina crucible with a cover and heated to 520 °C for 4 h with a ramping rate of 5 °C/min. After cooling it down naturally, the resultant agglomerate was ground into yellow powders, denoted as bulk C<sub>3</sub>N<sub>4</sub>.

### Synthesis of C<sub>3</sub>N<sub>4</sub>

Typically, 1.0 g of bulk C<sub>3</sub>N<sub>4</sub> and 5.0 g of NH<sub>4</sub>Cl mixed thoroughly in a ball mill. Then, the mixture was treated at 550 °C for 3 h at a heating rate of 3 °C/min. The as-synthesized samples were denoted as C<sub>3</sub>N<sub>4</sub>.

## Synthesis of 2D C<sub>3</sub>N<sub>4</sub>/NC

2D C<sub>3</sub>N<sub>4</sub>/NC were prepared via a polymerization method. Specifically, C<sub>3</sub>N<sub>4</sub> was modified with NC via a gas-blowing method. This is a process of calcining the mixture of NC, bulk C<sub>3</sub>N<sub>4</sub>, and NH<sub>4</sub>Cl. Typically, 1.0 g of bulk C<sub>3</sub>N<sub>4</sub>, a certain amount of NC, and 5.0 g of NH<sub>4</sub>Cl mixed thoroughly in a ball mill. Then, the mixture was treated at 550 °C for 3 h with a heating rate of 3 °C/min. The as-synthesized samples were denoted as C<sub>3</sub>N<sub>4</sub>/NC-I, C<sub>3</sub>N<sub>4</sub>/NC-II, C<sub>3</sub>N<sub>4</sub>/NC-III, where I, II, and III represent that the mass ratios of NC in C<sub>3</sub>N<sub>4</sub>/NC photocatalyst are 0.05, 0.075, 0.10 wt %, respectively.

## Characterization

XRD patterns were collected by a BRUKER AXS GMBH (D8 ADVANCE) machine with Cu K $\alpha$  radiation at the angle range of 10-90° (2 $\theta$ ). TEM images were recorded on a JEOL JEM-2100 transmission electron microscope (acceleration voltage of 200 kV). The UV-visible diffuse reflectance spectra were measured on an ultraviolet-visible spectrophotometer (UV 2600, Shimadzu Co.). Nitrogen adsorption and desorption measurements were carried out on an Autosorb iQ instrument, the surface areas were calculated by the Brunauer-Emmett-Teller (BET) method. Raman spectra were recorded on a Raman microscope (LABRAM-HR, JY Co.). XPS measurements were performed on a Kratos AXIS Ultra DLD spectrometer with a monochromatic Alka X-ray source. Thermogravimetric differential scanning calorimetry (TG-DSC) was performed on a NETZSCH STA449F3 (Germany) instrument. Fourier transform infrared spectra (FTIR) were recorded on Thermo Scientific spectrometer (Nicolet iS-5) in the frequency range of 4000 cm<sup>-1</sup>-450 cm<sup>-1</sup>. Photoluminescence (PL) spectra were collected on an Edinburgh spectrofluorometer (FLS980).

## Electrochemical measurements

The transient photocurrents (I-t), and electrochemical impedance spectroscopy (EIS) measurements of as-prepared samples were conducted on a CHI660E electrochemical workstation with a three-electrode system, where a sample-coated fluoride-tin oxide (FTO) glass was used as the working electrode, a saturated calomel electrode (SCE) and a Pt wire were acted as the reference electrode and counter electrode, respectively. The solution of 0.2 M Na<sub>2</sub>SO<sub>4</sub> purged with nitrogen was the electrolyte. A 300 W Xenon lamp with a 400 nm cutoff filter was chosen to be a light source. The working electrode was fabricated as following procedures: 5 mg of the photocatalyst was dispersed in 1 ml ethanol solution containing 20  $\mu$ l Nafion solution (5%) with constant sonication for 30 min, and then it was spin-coated on the FTO substrate (10 mm  $\times$  1.5 mm) and dried at 150 °C for 40 min.

## Photocatalytic H<sub>2</sub> evolution measurements

The photocatalytic experiment of H<sub>2</sub> evolution was carried in an online evacuation system (Perfectlight Labsolar-6A system), A 300 W Xe lamp (CEL-HX300) with a 400 nm cutoff filter was used as light source. Briefly, 10 mg photocatalysts dispersed in an 80 mL aqueous solution containing 10 vol % triethanolamine (TEOA) as the electron donor. 1 % Pt nanoparticles were deposited on the surface of as-synthesized catalysts via an in-situ photochemical method using K<sub>2</sub>PtCl<sub>6</sub> as a precursor. Before irradiation, the suspension was degassed for 30 min to thoroughly remove the dissolved air in electrolyte. The experimental temperature was controlled at 6 °C by adopting a liquid trap system with water circulation. The evolved gases

were quantitatively analyzed every one hour by the gas chromatography (FULI 979011) equipped with a TCD and 5 Å molecular sieve column.

### The external quantum efficiency (EQE) calculation

EQE has been determined using the follow equation:

$$EQE = \frac{\text{the number of reacted electrons}}{\text{the number of incident photons}} \times 100\%$$

Where the number of reacted electrons can be used for the molecule of H<sub>2</sub> evolution, and the number of incident photons is the photons number reaching the surface of catalysts. The H<sub>2</sub> generation rate was measured in the same reaction system as predicted in the experimental section. In addition, photocatalysts were irradiated with monochromatic light generated by equipping with a bandpass filter (400 nm). The numbers of photons were obtained according to the follow equation:

$$N = \frac{E\lambda}{hc}$$

Where E, λ, h and c are the light intensity, wavelength, Planck constant and velocity of light, respectively.

#### The calculation process of C<sub>3</sub>N<sub>4</sub>/NC:

$$N = \frac{E\lambda}{hc} = \frac{40.5 \times 10^{-3} \times 3600 \times 400 \times 10^{-9}}{6.626 \times 10^{-34} \times 3 \times 10^8} = 2.93 \times 10^{20}$$

$$EQE = \frac{\text{the number of reacted electrons}}{\text{the number of incident photons}} \times 100\%$$

$$= \frac{2 \times \text{the number of evolved H}_2 \text{ molecules}}{N} \times 100\%$$

$$= \frac{2 \times 6.02 \times 10^{23} \times 8.637 \times 16.53 \times 10^{-6}}{2.93 \times 10^{20}} \times 100\% = 6.79\%$$

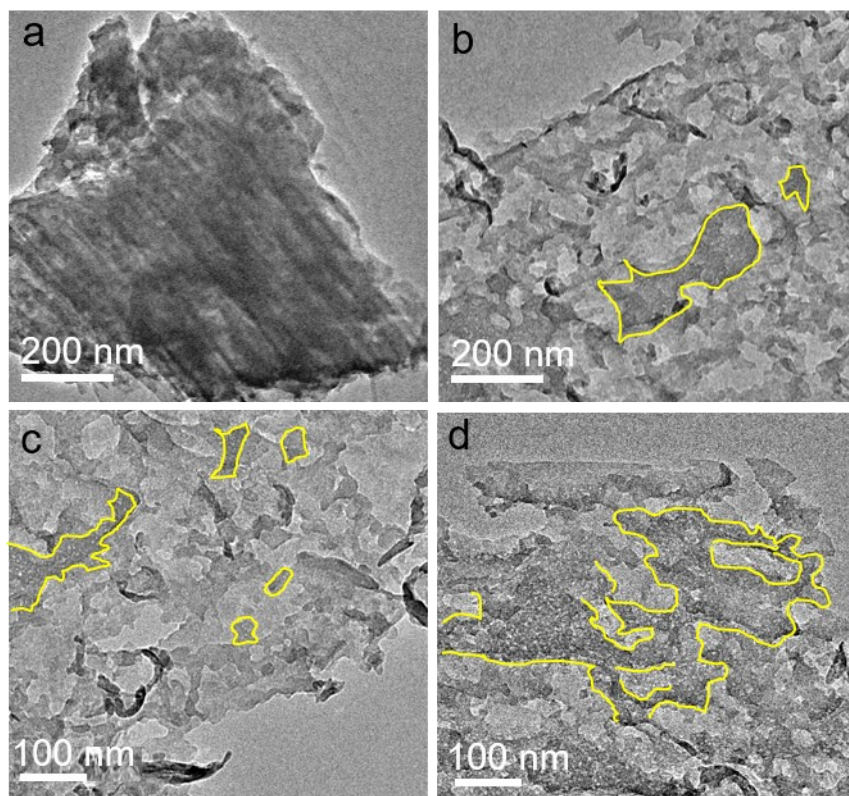

**Fig. S1** TEM images of photocatalysts. (a) bulk  $C_3N_4$ ; (b)  $C_3N_4/NC$ ; (c)  $C_3N_4/NC-I$ ; (d)  $C_3N_4/NC-III$ .  $C_3N_4/NC$ ,  $C_3N_4/NC-I$ , and  $C_3N_4/NC-III$  were prepared with the NC mass ratio in  $C_3N_4/NC$  of 0.05%, 0.075%, and 0.10%, respectively. NC was marked with yellow line.

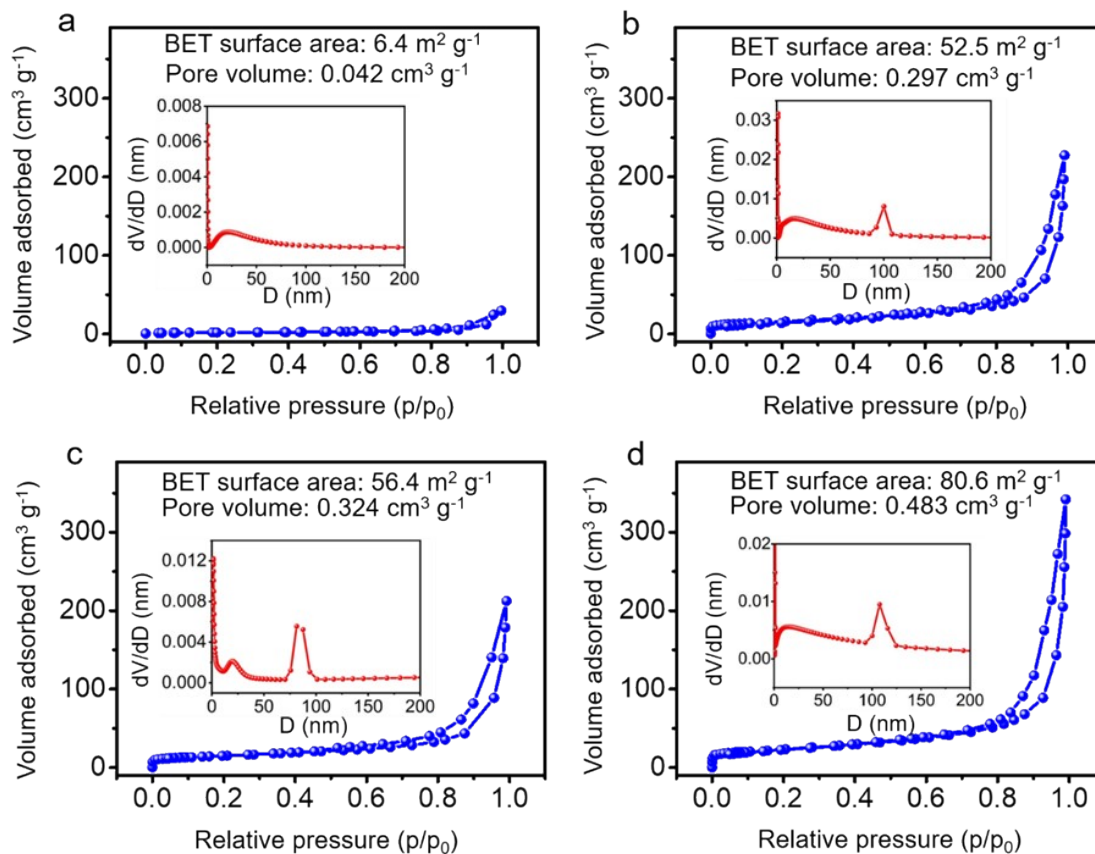

**Fig. S2**  $N_2$  adsorption-desorption isotherms and pore size distribution plots (inset). (a) bulk  $C_3N_4$ ; (b)  $C_3N_4$ ; (c)  $C_3N_4/NC-I$ ; (d)  $C_3N_4/NC-III$ .  $C_3N_4/NC-I$  and  $C_3N_4/NC-III$  were prepared with the NC mass ratio in  $C_3N_4/NC$  of 0.05% and 0.10%, respectively.

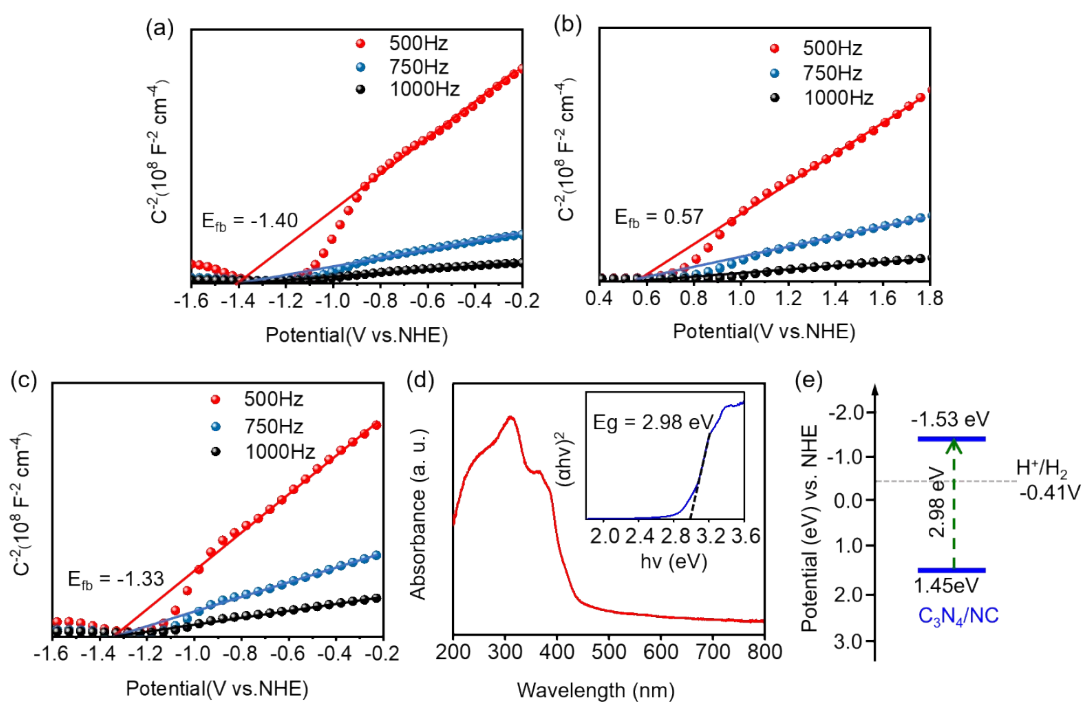

**Fig. S3** (a-c) Mott-Schottky measurements of  $C_3N_4$ , NC, and  $C_3N_4/NC$ , respectively; (d) Light absorption and  $E_g$  spectra (the insert plot) of  $C_3N_4/NC$ ; (e) Band structure of  $C_3N_4/NC$ .

In Fig S3 a-c, the  $E_{fb}$  of  $C_3N_4$ , NC, and  $C_3N_4/NC$  are -1.4, 0.57, and -1.33 V versus the normal hydrogen electrode (vs. NHE), respectively. Generally, the conduction band (CB) position is 0.2 eV higher than the flat-band potential ( $E_{fb}$ ) for n-type semiconductor. So, the (CB) positions of  $C_3N_4$ , NC, and  $C_3N_4/NC$  are -1.6, 0.77, and -1.53 eV, respectively. Based on the bandgaps and CB positions (Fig. 4a, b, and Fig. S3a-d), VB positions of  $C_3N_4$ , NC,  $C_3N_4/NC$  are 1.42, 3.11, and 1.45 eV, respectively. These results not only are consistent with those in Fig. 4d, but also prove that the strong interaction between  $C_3N_4$  and NC leads to the change of CB/VB levels.



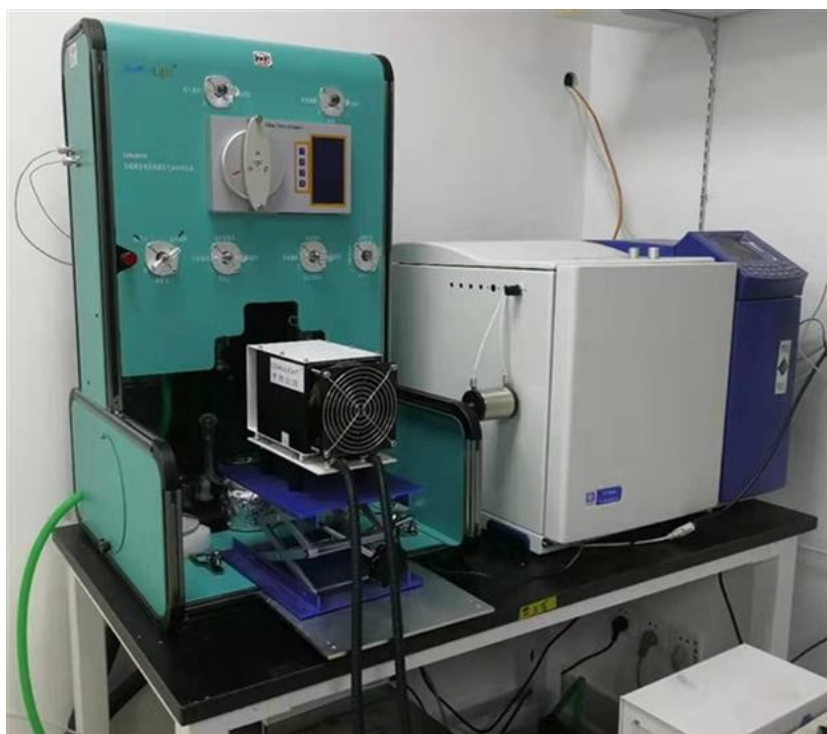

**Fig. S5** Online photocatalytic test system.



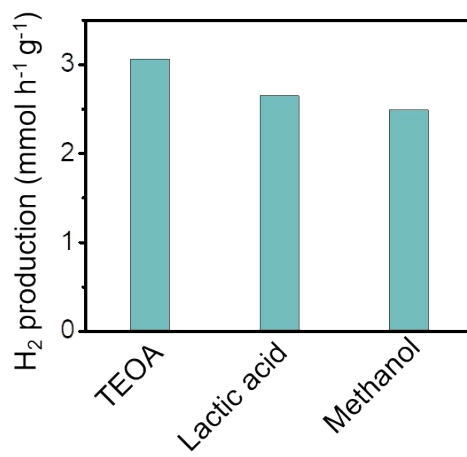

**Fig. S6** The photocatalytic rate over C<sub>3</sub>N<sub>4</sub>/NC measured in different sacrificial reagents (TEOA, lactic acid, and methanol).

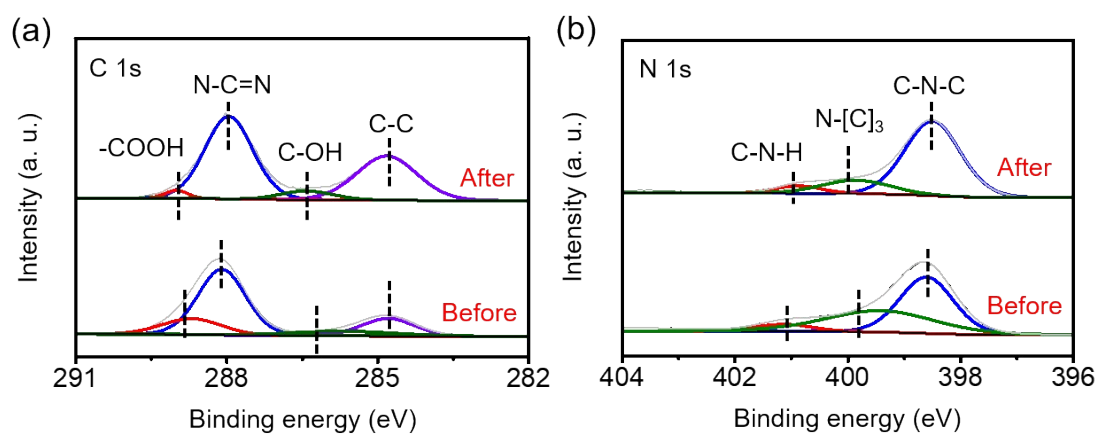

**Fig. S7** XPS spectra of C<sub>3</sub>N<sub>4</sub>/NC before and after photocatalytic H<sub>2</sub> evolution reaction. (a) C 1s; (b) N 1s.

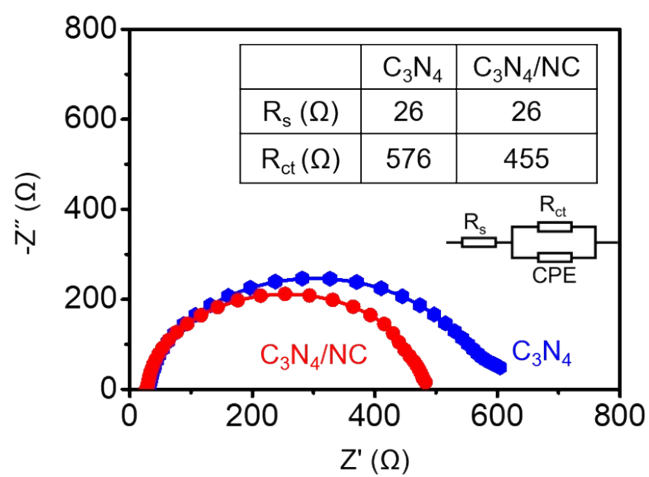

**Fig. S8** The EIS comparison of  $C_3N_4$  and  $C_3N_4/NC$ .  $R_{ct}$  is the equivalent Randle circuit composed of the interfacial charge transfer resistance at the electrode/electrolyte interface;  $R_s$  is the electrolyte solution resistance; CPE is the constant phase element.

**Table S1** Percentage of various atomic bonds obtained from XPS C 1s and N 1s spectra.

| Sample                            | C-C   | N-C=N | -COOH | C-N=C | N-(C) <sub>3</sub> | C-N-H |
|-----------------------------------|-------|-------|-------|-------|--------------------|-------|
| C <sub>3</sub> N <sub>4</sub>     | 31.5  | 59.40 | 0     | 67.01 | 18.81              | 0     |
| C <sub>3</sub> N <sub>4</sub> /NC | 20.03 | 65.30 | 14.67 | 55.65 | 30.19              | 14.16 |

**Table S2** Comparison of H<sub>2</sub> production for carbon modified C<sub>3</sub>N<sub>4</sub>.

| Photocatalyst                                                                    | Co-catalyst | Photocatalyst (mg)<br>Reaction solvent (ml) | H <sub>2</sub> evolution rate               | Ref                  |
|----------------------------------------------------------------------------------|-------------|---------------------------------------------|---------------------------------------------|----------------------|
| g-C <sub>3</sub> N <sub>4</sub> /NC                                              | 0.5 wt% Pt  | $\frac{10 \text{ mg}}{20 \text{ ml}}$       | 23 $\mu\text{mol h}^{-1} \text{ g}^{-1}$    | S2                   |
| ND@ g-C <sub>3</sub> N <sub>4</sub>                                              | 1.0 wt% Pt  | $\frac{50 \text{ mg}}{100 \text{ mg}}$      | 59.1 $\mu\text{mol h}^{-1}$                 | S3                   |
| N-doped<br>graphitic carbon-<br>incorporated g-<br>C <sub>3</sub> N <sub>4</sub> | 3.0 wt% Pt  | $\frac{50 \text{ mg}}{100 \text{ ml}}$      | 64 $\mu\text{mol h}^{-1} \text{ g}^{-1}$    | S4                   |
| UCN/CQDs                                                                         | 0.2 wt% Pt  | $\frac{50 \text{ mg}}{100 \text{ ml}}$      | 88.1 $\mu\text{mol h}^{-1}$                 | S5                   |
| CNNS/CQDs                                                                        | 3.0 wt% Pt  | $\frac{50 \text{ mg}}{100 \text{ ml}}$      | 116.1 $\mu\text{mol h}^{-1}$                | S6                   |
| Amorphous<br>carbon/g-C <sub>3</sub> N <sub>4</sub>                              | 1.0 wt% Pt  | $\frac{50 \text{ mg}}{80 \text{ ml}}$       | 212.8 $\mu\text{mol h}^{-1} \text{ g}^{-1}$ | S7                   |
| CNNS/CQDs                                                                        | /           | $\frac{10 \text{ mg}}{10 \text{ ml}}$       | 219.5 $\mu\text{mol h}^{-1} \text{ g}^{-1}$ | S8                   |
| CN/N-C/Pt                                                                        | 3.0 wt% Pt  | $\frac{50 \text{ mg}}{50 \text{ ml}}$       | 685 $\mu\text{mol h}^{-1} \text{ g}^{-1}$   | S9                   |
| C <sub>3</sub> N <sub>4</sub> /NC                                                | 1.0 wt% Pt  | $\frac{10 \text{ mg}}{80 \text{ ml}}$       | 3060 $\mu\text{mol h}^{-1} \text{ g}^{-1}$  | <b>This<br/>work</b> |

**Table S3** Comparison of H<sub>2</sub> production for NiS or MoS<sub>x</sub> modified C<sub>3</sub>N<sub>4</sub>.

| Photocatalyst                                     | Co-catalyst      | $\frac{\text{Photocatalyst (mg)}}{\text{Reaction solvent (ml)}}$ | H <sub>2</sub> evolution rate<br>( $\mu\text{mol h}^{-1} \text{g}^{-1}$ ) | Ref              |
|---------------------------------------------------|------------------|------------------------------------------------------------------|---------------------------------------------------------------------------|------------------|
| NiS/g-C <sub>3</sub> N <sub>4</sub>               | NiS              | $\frac{50 \text{ mg}}{80 \text{ ml}}$                            | 244                                                                       | S10              |
| MoS <sub>2</sub> /g-C <sub>3</sub> N <sub>4</sub> | MoS <sub>2</sub> | $\frac{50 \text{ mg}}{250 \text{ ml}}$                           | 1155                                                                      | S11              |
| MoS <sub>x</sub> /g-C <sub>3</sub> N <sub>4</sub> | MoS <sub>x</sub> | $\frac{10 \text{ mg}}{100 \text{ ml}}$                           | 1586                                                                      | S12              |
| g-C <sub>3</sub> N <sub>4</sub> /NiS              | NiS              | $\frac{50 \text{ mg}}{80 \text{ ml}}$                            | 593.6                                                                     | S13              |
| NiS <sub>2</sub> /g-C <sub>3</sub> N <sub>4</sub> | NiS <sub>2</sub> | $\frac{50 \text{ mg}}{80 \text{ ml}}$                            | 116.34                                                                    | S14              |
| g-C <sub>3</sub> N <sub>4</sub> /Ni/NiS           | NiS              | $\frac{50 \text{ mg}}{100 \text{ ml}}$                           | 515                                                                       | S15              |
| C <sub>3</sub> N <sub>4</sub> /NC/Pt              | Pt               | $\frac{10 \text{ mg}}{80 \text{ ml}}$                            | 3060                                                                      | <b>This work</b> |

## References

- S1 M. Ou, J. Li, Y. Chen, S. Wan, S. Zhao, J. Wang, Y. Wu, C. Ye and Y. Chen, *Chem. Engin. J.*, 2021, **424**, 130170.
- S2 X. Hou, L. Cui, H. Du, L. Gu, Z. Li and Y. Yuan, *Appl. Catal. B: Environ.*, 2020, **278**, 119253.
- S3 L. X. Su, Q.-Z. Huang, Q. Lou, Z. Y. Liu, J. L. Sun, Z. T. Zhang, S. R. Qin, X. Li, J. H. Zang, L. Dong and C. X. Shan, *Carbon*, 2018, **139**, 164-171.
- S4 Y. Zhou, L. Zhang, W. Huang, Q. Kong, X. Fan, M. Wang and J. Shi, *Carbon*, 2016, **99**, 111-117.
- S5 Q. Liu, T. Chen, Y. Guo, Z. Zhang and X. Fang, *Appl. Catal. B: Environ.*, 2016, **193**, 248-258.
- S6 K. Li, F. Y. Su and W. D. Zhang, *Appl. Surf. Sci.*, 2016, **375**, 110-117.
- S7 Q. Xu, B. Cheng, J. Yu and G. Liu, *Carbon*, 2017, **118**, 241-249.
- S8 X. Xia, N. Deng, G. Cui, J. Xie, X. Shi, Y. Zhao, Q. Wang, W. Wang and B. Tang, *Chem. Commun.*, 2015, **51**, 10899-10902.
- S9 J. Wang, Q. Zhou, Y. Shen, X. Chen, S. Liu and Y. Zhang, *Langmuir*, 2019, **35**, 12366-12373.
- S10 M. Wang, J. Cheng, X. Wang, X. Hong, J. Fan and H. Yu, *Chinese. J. Catal.*, 2021, **42**, 37-45.
- S11 Y. J. Yuan, Z. Shen, S. Wu, Y. Su, L. Pei, Z. Ji, M. Ding, W. Bai, Y. Chen, Z. Yu and Z. Zou, *Appl. Catal. B: Environ.*, 2019, **246**, 120-128.
- S12 X. Li, B. Wang, X. Shu, D. Wang, G. Xu, X. Zhang, J. Lv and Y. Wu, *RSC Adv.*, 2019, **9**, 15900-15909.
- S13 K. He, J. Xie, M. Li and X. Li, *Appl. Surf. Sci.*, 2018, **430**, 208-217.
- S14 F. Chen, H. Yang, X. Wang and H. Yu, *Chinese. J. Catal.*, 2017, **38**, 296-304.
- S15 J. Wen, J. Xie, H. Zhang, A. Zhang, Y. Liu, X. Chen and X. Li, *ACS Appl. Mater. Interfaces*, 2017, **9**, 14031-14042.
